# Supplementary material
Source: Springer Nature journal article supplement (https://www.springermedizin.de/resource/supplementary/12933_2012_579_MOESM5_ESM.pdf/9538462)
Supplement: MOESM5 [file 9538462]

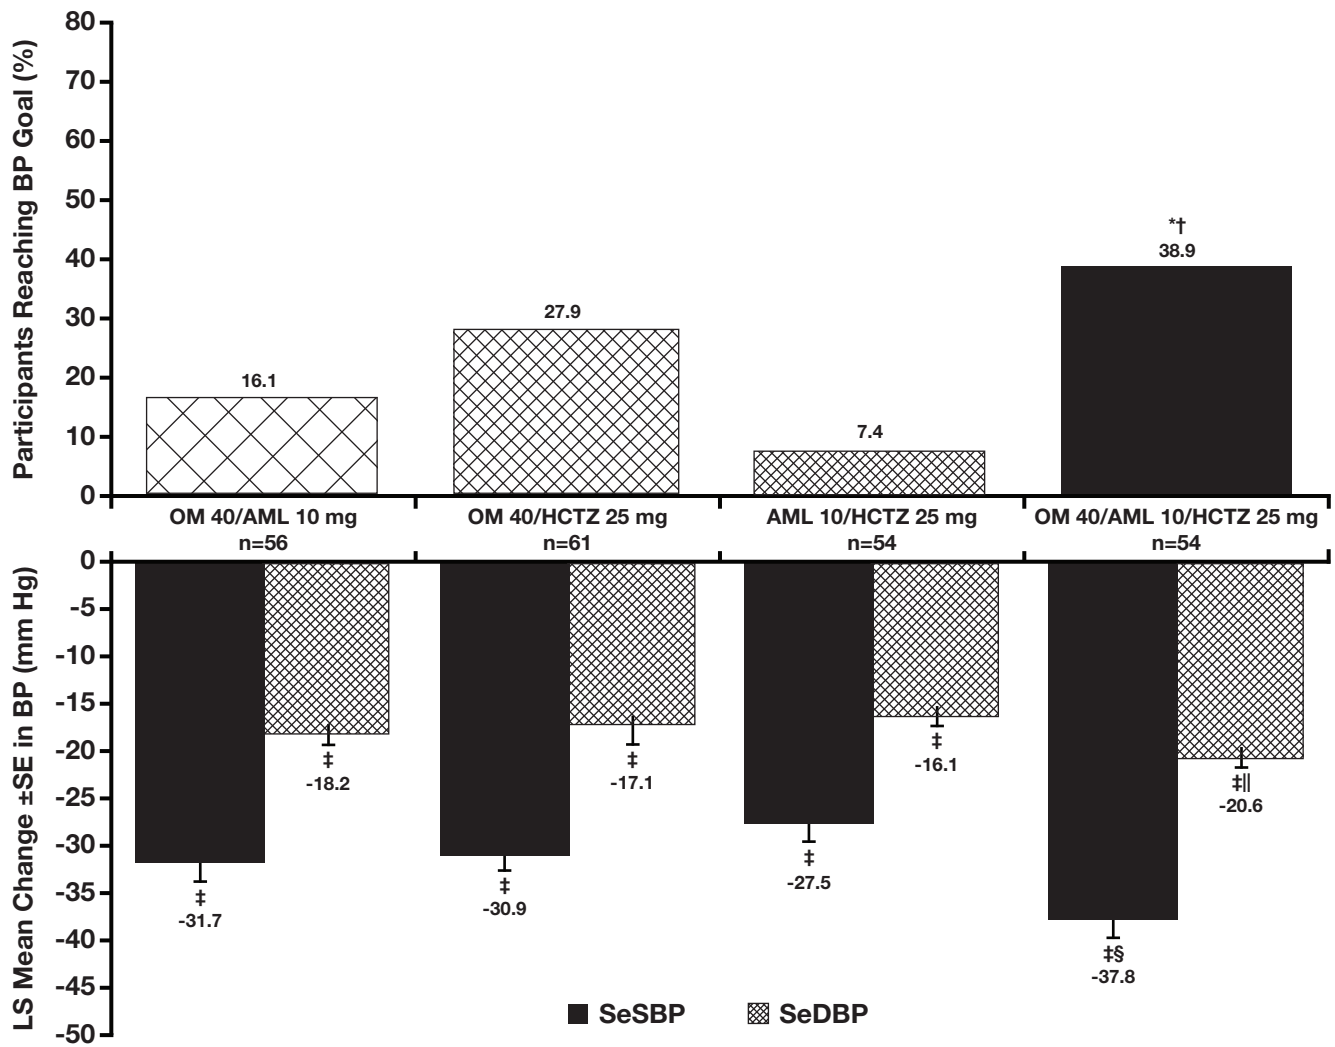

\* $P=0.0099$  vs OM 40/AML 10 mg;  $^{\dagger}P=0.0002$  vs AML 10/HCTZ 25 mg;  $^{\ddagger}P<0.0001$  vs baseline;

$^{\S}P\leq 0.0360$  vs each dual-combination treatment;  $^{\parallel}P\leq 0.0434$  vs OM 40/HCTZ 25 mg and AML 10/HCTZ 25 mg.
